# Supplementary material for: Interfacial CO2-mediated nanoscale oil transport: from impediment to enhancement
Source: Royal Society of Chemistry journal article supplement (doi:10.1039/d0cp03930f), 2020-01-01
Supplement: d0cp03930f1.pdf [file d0cp03930f1.pdf]

*Electronic Supplementary Information*

**Interfacial CO<sub>2</sub>-Mediated Nanoscale Oil Transport:  
from Impediment to Enhancement**

Do Yoon Moh,<sup>1</sup> Chao Fang,<sup>1,†</sup> Xiaolong Yin,<sup>2</sup> and Rui Qiao<sup>1,\*</sup>

<sup>1</sup> Department of Mechanical Engineering, Virginia Tech, Blacksburg, VA 24061, USA

<sup>2</sup> Petroleum Engineering Department, Colorado School of Mines, Golden, CO 80401, USA

**S1. Simulation setup and results**

**Table S1.** The setup and results of simulations with different CO<sub>2</sub> adsorption density  $\Gamma_{\text{CO}_2}$ .

| Case name                                    | 1A   | 1-1  | 1-2  | 1-3  | 1-4  | 1-5  | 1-6  | 1B   |
|----------------------------------------------|------|------|------|------|------|------|------|------|
| number of decane molecule                    | 442  | 431  | 421  | 410  | 407  | 405  | 402  | 400  |
| $\Gamma_{\text{CO}_2}$ (nm <sup>-2</sup> )   | 0    | 1.28 | 2.56 | 3.85 | 4.17 | 4.49 | 4.81 | 5.12 |
| Corresponding CO <sub>2</sub> bath pressure* | 0    | -    | -    | -    | -    | 2.1  | 8.0  | 24.3 |
| $\delta$ (nm)                                | 0.06 | 0.15 | 0.23 | 0.32 | 0.34 | 0.36 | 0.38 | 0.39 |
| $w_e = w - 2\delta$ (nm)                     | 7.88 | 7.70 | 7.54 | 7.36 | 7.32 | 7.28 | 7.24 | 7.23 |
| decane permeability ( $\mu\text{D}$ )        | 4.79 | 3.46 | 3.43 | 4.00 | 4.26 | 4.65 | 5.27 | 5.82 |

\* estimated using the CO<sub>2</sub> adsorption isotherm shown in Fig. S2.

**S2. Adsorption isotherm of CO<sub>2</sub> on calcite surfaces**

We compute the adsorption isotherm of CO<sub>2</sub> on a calcite surface exposed to a thick decane layer. Figure S1a shows a schematic of the simulation setup. A series of simulations, in which the number of CO<sub>2</sub> molecules in the system are varied, are performed. The CO<sub>2</sub> gas density in the region away from the decane layer is recorded, and the CO<sub>2</sub> pressure corresponding to the recorded gas density is then computed in a separate bulk CO<sub>2</sub> simulation. Figure S1b shows the density profile of CO<sub>2</sub> and decane molecules across the system in one of the simulations. A CO<sub>2</sub> molecule is considered adsorbed on the calcite surface if it is located within the first CO<sub>2</sub> density peak (cf. Fig. S1b). Figure S2 shows the adsorption isotherm of CO<sub>2</sub> molecule thus computed. The saturation adsorption limit is  $\sim 5.15 \text{ nm}^{-2}$ .

\* To whom correspondence should be addressed. Email: [ruiqiao@vt.edu](mailto:ruiqiao@vt.edu)

† Present address: Department of Chemical and Biomolecular Engineering, University of California, Berkeley.

Figure S1c compares the CO<sub>2</sub> density profile near a calcite surface computed in simulation based on the system shown in Fig. S1a and in simulation based on the system shown in Fig. 1 in the main text. The CO<sub>2</sub> adsorption density is 5.12 nm<sup>-2</sup> in both simulations. The excellent agreement between the CO<sub>2</sub> profiles obtained from these systems confirms that the virtual graphene layer shown in Fig. 1 hardly perturb the distribution of the CO<sub>2</sub> adsorption layer on the calcite surface other than preventing them from leaving the interfacial zone.

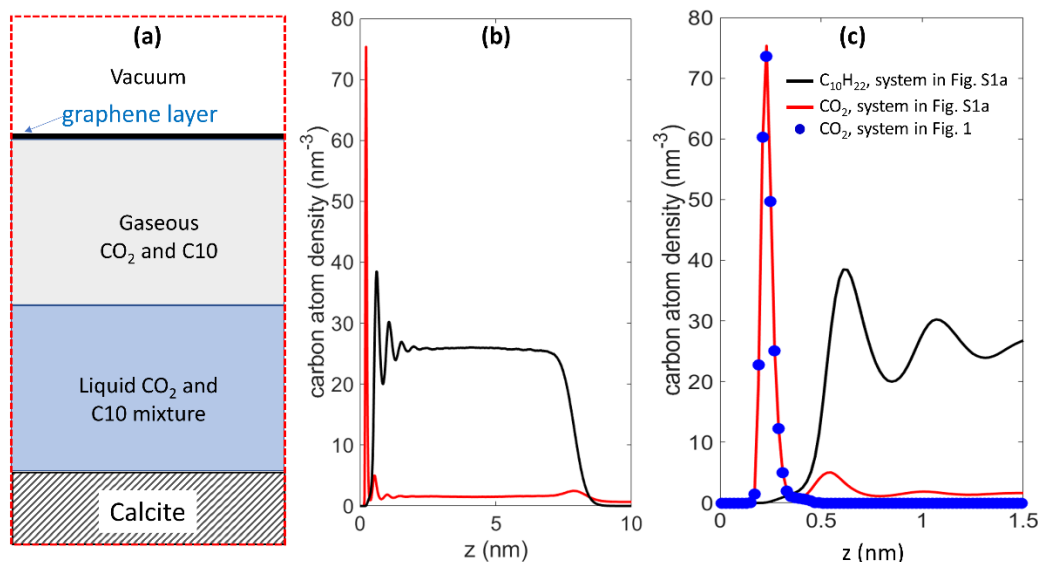

**Fig. S1.** (a) A schematic of the system used for computing the adsorption isotherm of CO<sub>2</sub> on a calcite surface exposed to a thick decane layer. The red dashed lines denote the fully periodic simulation box. (b) The CO<sub>2</sub> and decane density profiles in a sample case where the CO<sub>2</sub> density in the space above the decane layer is  $0.65 \pm 0.05$  nm<sup>-3</sup>, which corresponds to a CO<sub>2</sub> pressure of 24.3 bar. The density of the first CO<sub>2</sub> adsorption layer in both systems is 5.12 nm<sup>-2</sup>. (c) Comparison of CO<sub>2</sub> density profiles near calcite surfaces obtained in system shown in (a) and in Fig. 1 in the main text, where CO<sub>2</sub> molecules are confined near the calcite surface using a virtual graphene plane. The density of the first CO<sub>2</sub> adsorption layer in both systems is 5.12 nm<sup>-2</sup>.

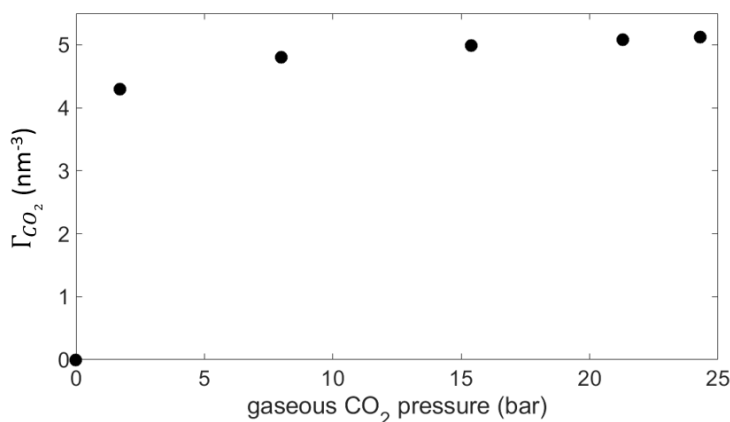

**Fig. S2.** The CO<sub>2</sub> adsorption isotherm obtained from simulations based on the system shown in Fig. S1a.

### S3. Sample velocity embedding calculation results

In the velocity embedding technique, we compute the velocity profile of decane in a wide pore by (1) embedding the MD velocity profile in a near-wall region ( $z \leq \Delta$ ) computed in a narrow pore (8 nm-wide in this work) and (2) solving the Stokes equation in the region outside of the near-wall region. This method requires the density and transport properties of fluids (here, decane and  $\text{CO}_2$ ) within the near-wall region in the narrow and wide pore to be identical, which is true in this study: in the 8 nm-wide pore, the interfacial region near both pore walls do not affect each other; therefore, in any wider pores, the structure of the interfacial region is identical to that in the 8 nm-wide pore. Figure S4 shows an example of the velocity embedding result.

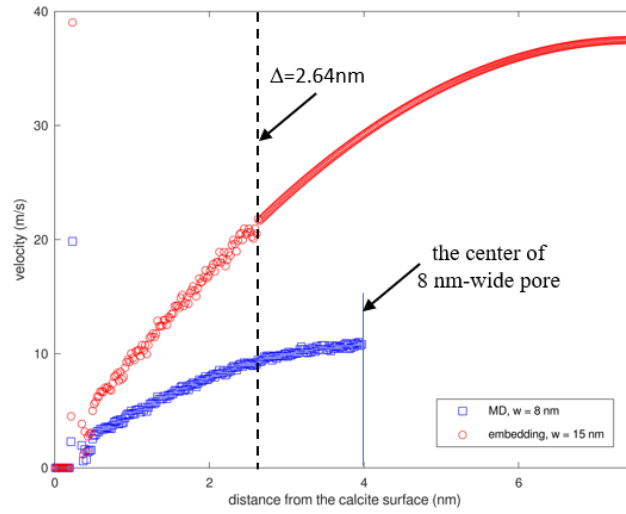

**Fig. S3.** The velocity profiles in a 15 nm-wide pore with  $\Gamma_{\text{CO}_2} = 5.12 \text{ nm}^{-2}$  computed using the velocity embedding technique. Here, the velocity profile for  $z \leq 2.64 \text{ nm}$  is embedded from the velocity profile in an 8 nm-wide pore with the same  $\text{CO}_2$  adsorption density and that outside of this region is computed by solving the Stokes equation. Only the velocity profile in the lower half of the pore is shown because of symmetry.

#### S4. Distribution of interfacial decane molecules' constituent atoms

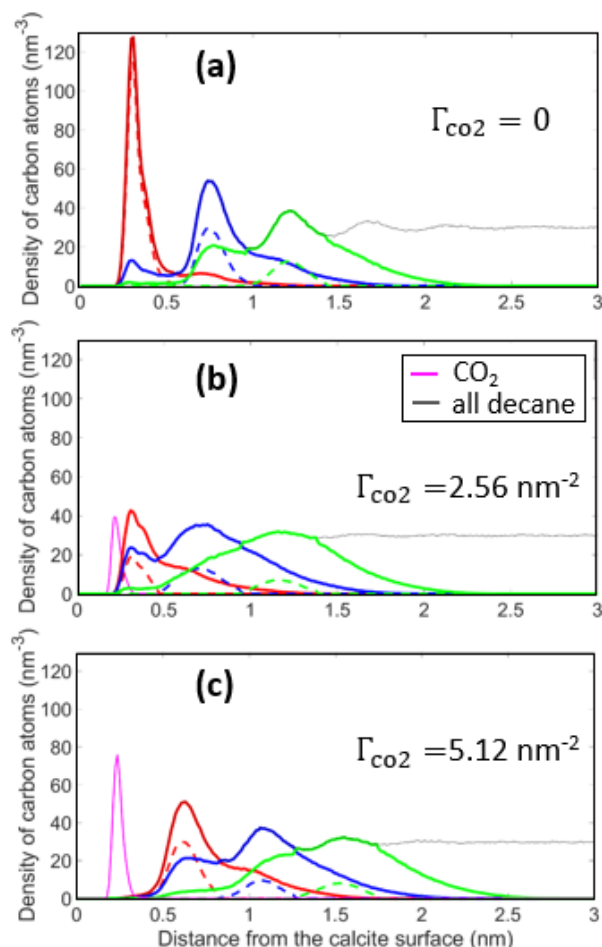

**Fig. S4.** Distribution of the carbon atoms of interfacial decane molecules for systems with  $\Gamma_{\text{CO}_2} = 0$  (a),  $\Gamma_{\text{CO}_2} = 2.56 \text{ nm}^{-2}$  (b), and  $\Gamma_{\text{CO}_2} = 5.12 \text{ nm}^{-2}$  (c). The interfacial decane is divided into layers based on the valleys of decane carbon atom's density profile. A decane molecule belongs to a certain interfacial layer if at least one of its carbon atoms resides in that layer (a decane molecule thus can simultaneously belong to more than one interfacial layer). In each panel, the solid red/blue/green line denotes the density of the carbon atoms of all decane molecules in the first/second/third decane layer, while the dashed red/blue/green line denotes the density of the carbon atoms of those decane molecules whose carbons *all* reside in the same layer. In (b), blue and red lines have considerable overlap with the density profile of  $\text{CO}_2$  molecule, indicating a good mixing of the  $\text{CO}_2$  and the interfacial decane molecules.

## S5. Orientation of CO<sub>2</sub> molecules adsorbed on calcite surfaces

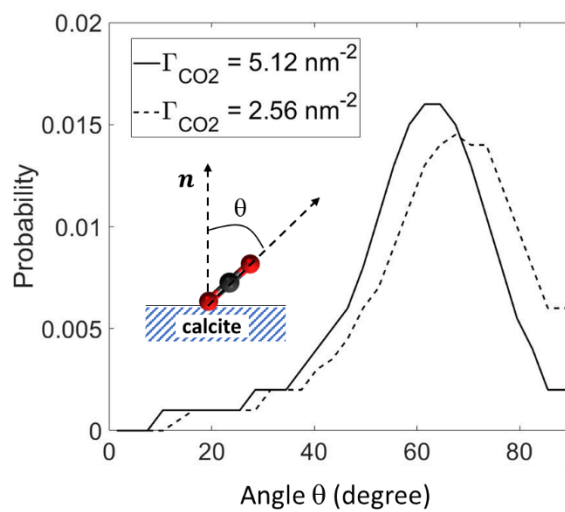

**Figure S5.** The distribution of the orientation angle of CO<sub>2</sub> molecules adsorbed on a calcite surface with respect to the surface's normal direction.
